# Supplementary material for: A systematic review of heterosexual anal intercourse and its role in the transmission of HIV and other sexually transmitted infections in Papua New Guinea
Source: PubMed Central journal article supplement (PMC4219522; doi:10.1186/1471-2458-13-1108), 2013-12-01

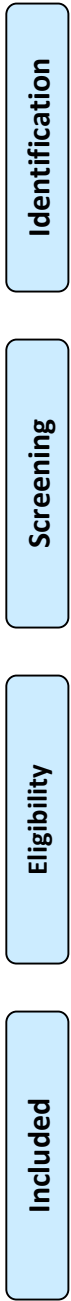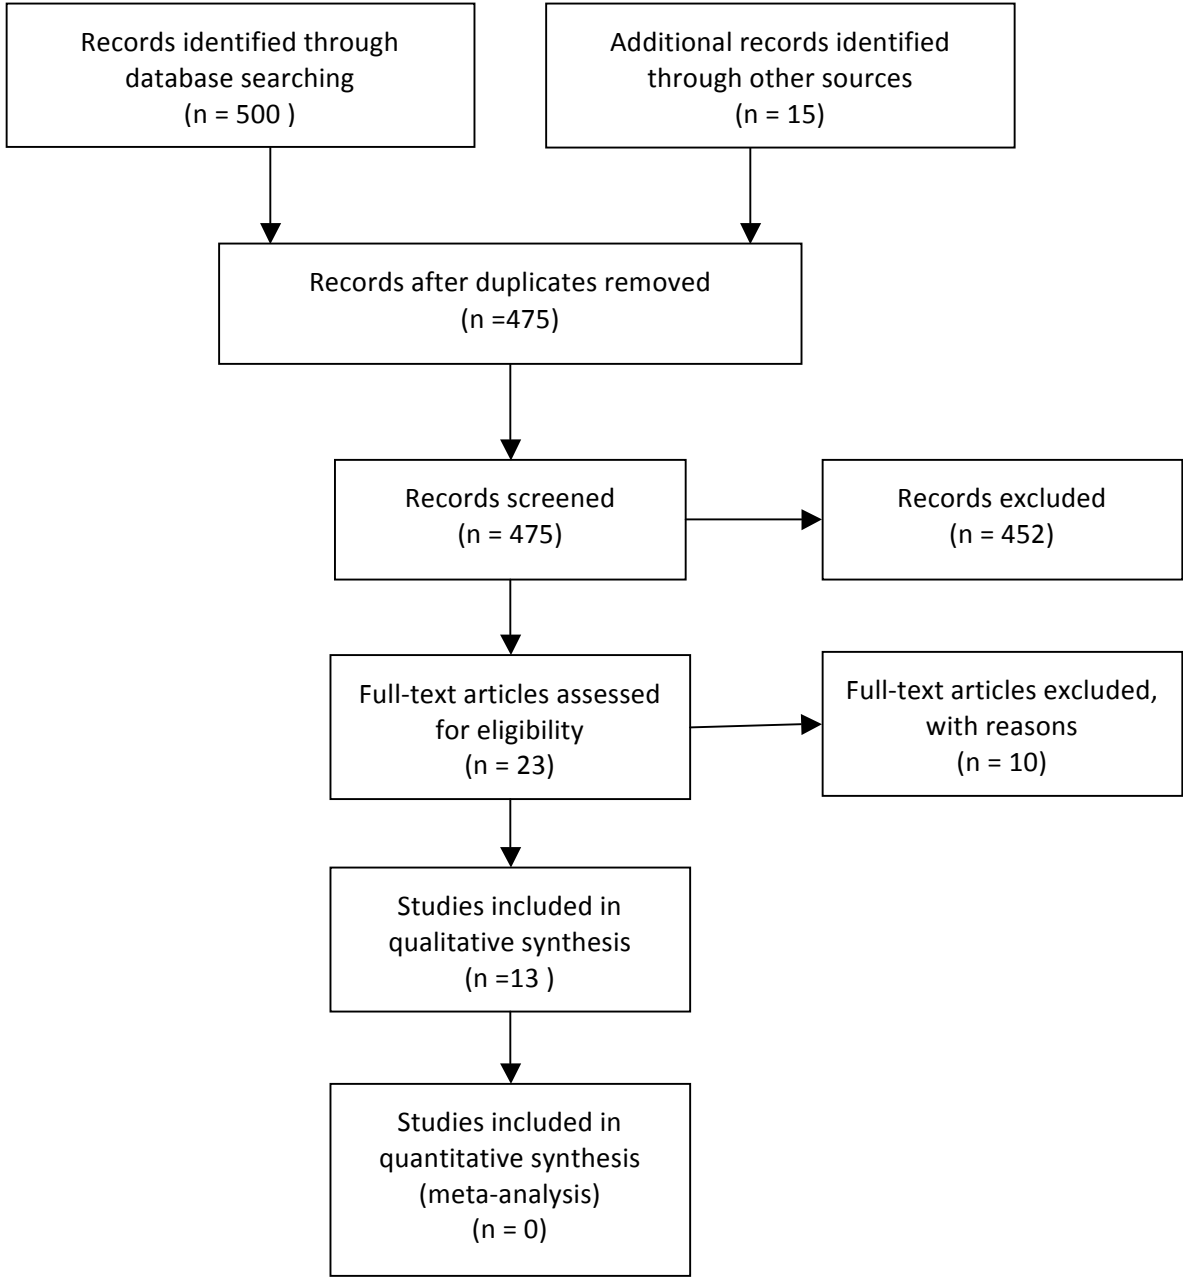

Supplement: 1471-2458-13-1108-S1.pdf [file 1471-2458-13-1108-S1.pdf]
